# Supplementary material
Source: publisher figshare collection journal article supplement (https://gsajournals.figshare.com/articles/dataset/_/7324526)
Supplement: Supplementary file 1 [file 1]

Archive with 20 entries (20 files):
- Fig_S19.pdf
- Fig_S18.pdf
- Fig_S17.pdf
- Fig_S16.pdf
- Fig_S15.pdf
- Fig_S14.pdf
- Fig_S13.pdf
- Fig_S12.pdf
- Fig_S11.pdf
- Fig_S10.pdf
- Fig_S9.pdf
- Fig_S8.pdf
- Fig_S7.pdf
- Fig_S6.pdf
- Fig_S5.pdf
- Fig_S4.pdf
- Table_S1.pdf
- Fig_S3.pdf
- Fig_S2.pdf
- Fig_S1.pdf
