# Supplementary material
Source: publisher figshare collection journal article supplement (https://gsajournals.figshare.com/articles/dataset/_/7324526)
Supplement: Supplementary file 1 [file 1 › Fig_S4.pdf]

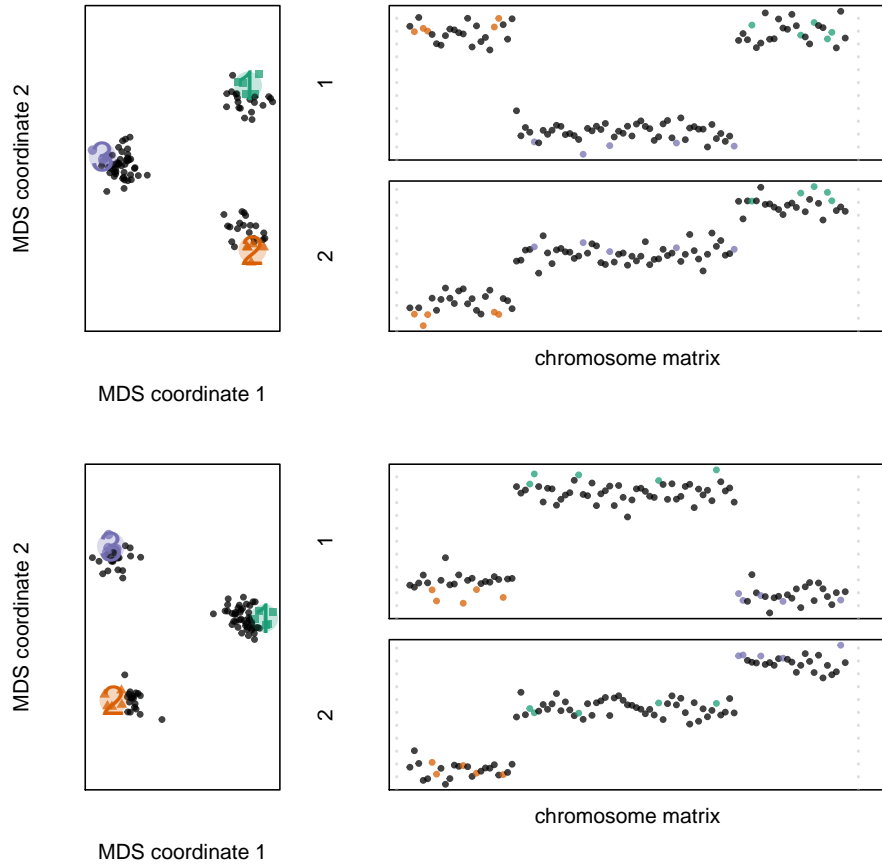

Figure S4: MDS visualizations of the Gaussian genotypes described in Appendix B.1, for 50 individuals from each of three populations. **(top)** The first quarter, middle half, and final quarter of the chromosome each have different population structure, as expected, despite the possibility for PC switching within each. **(bottom)** The same picture results even after marking a random 50% of the genotypes in the first half of the chromosome as missing.
