# Supplementary material
Source: publisher figshare collection journal article supplement (https://gsajournals.figshare.com/articles/dataset/_/7324526)
Supplement: Supplementary file 1 [file 1 › Fig_S7.pdf]

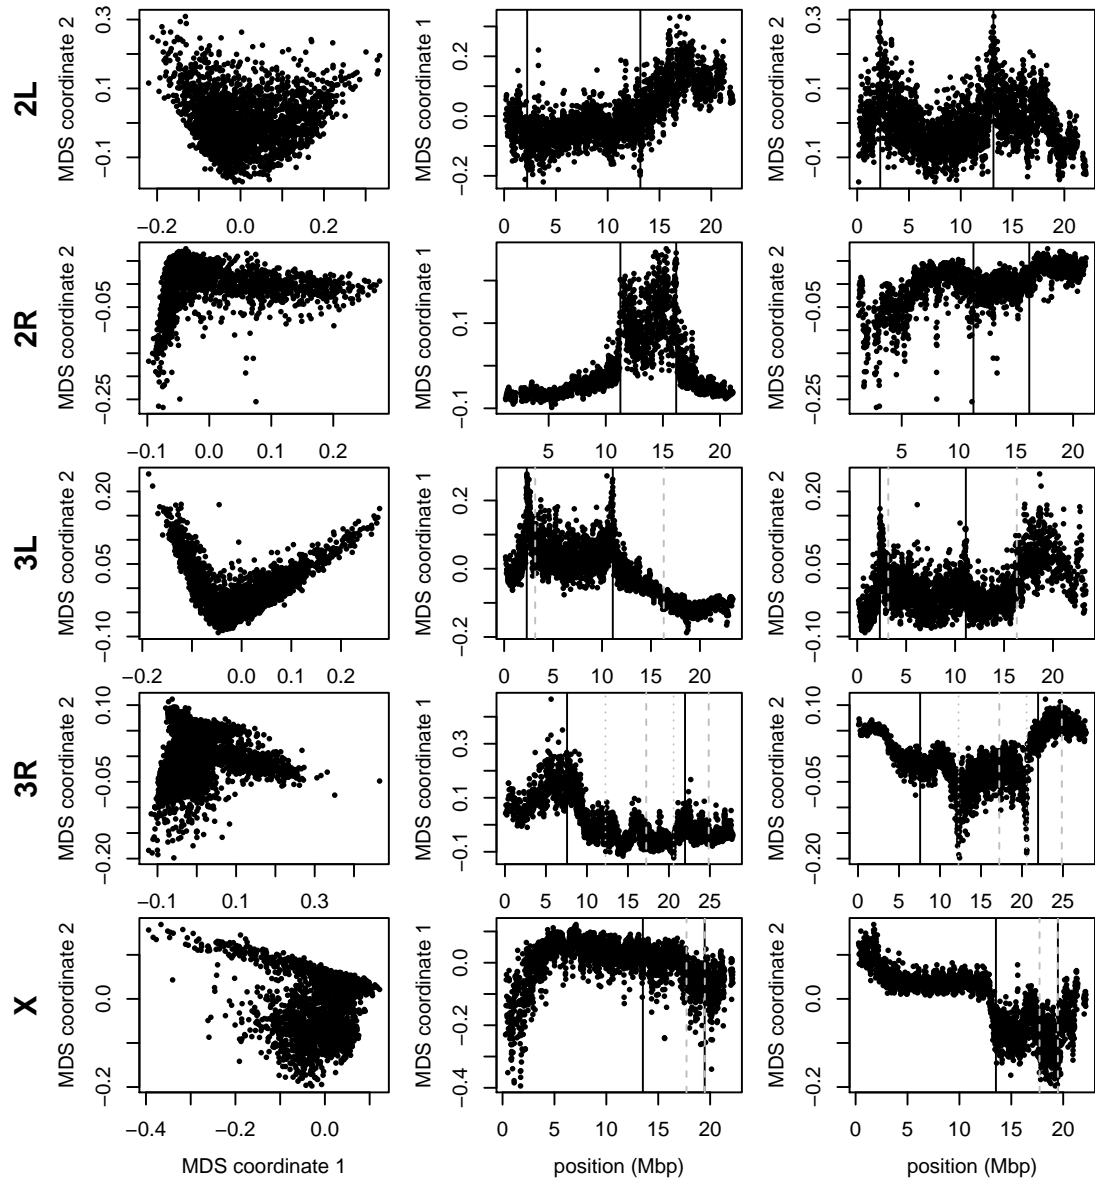

Figure S7: MDS visualizations for each chromosome arm of *Drosophila melanogaster*, as in Figure 2, except that the method was run using five PCs ( $k = 5$ ) instead of two.
