# Supplementary material
Source: publisher figshare collection journal article supplement (https://gsajournals.figshare.com/articles/dataset/_/7324526)
Supplement: Supplementary file 1 [file 1 › Fig_S8.pdf]

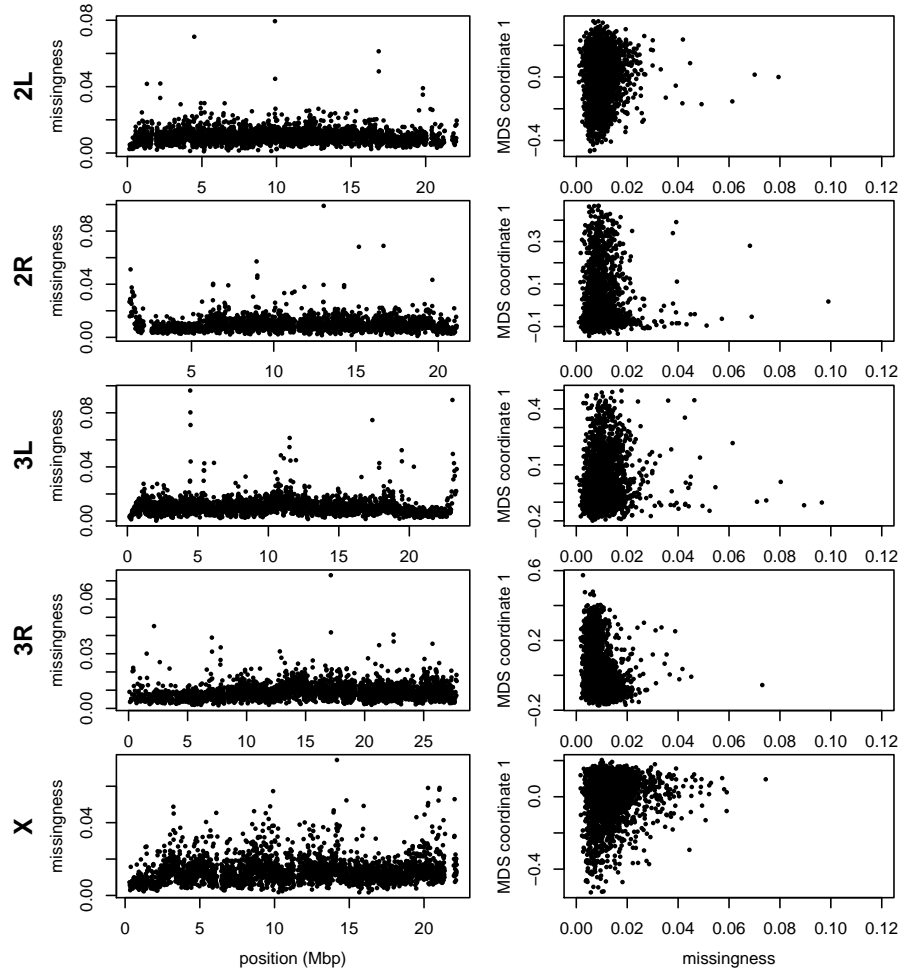

Figure S8: The proportion of data in each window that are missing, compared to the value of the first MDS coordinate for the *Drosophila melanogaster* data from Figure 2.
