# Supplementary material
Source: publisher figshare collection journal article supplement (https://gsajournals.figshare.com/articles/dataset/_/7324526)
Supplement: Supplementary file 1 [file 1 › Fig_S10.pdf]

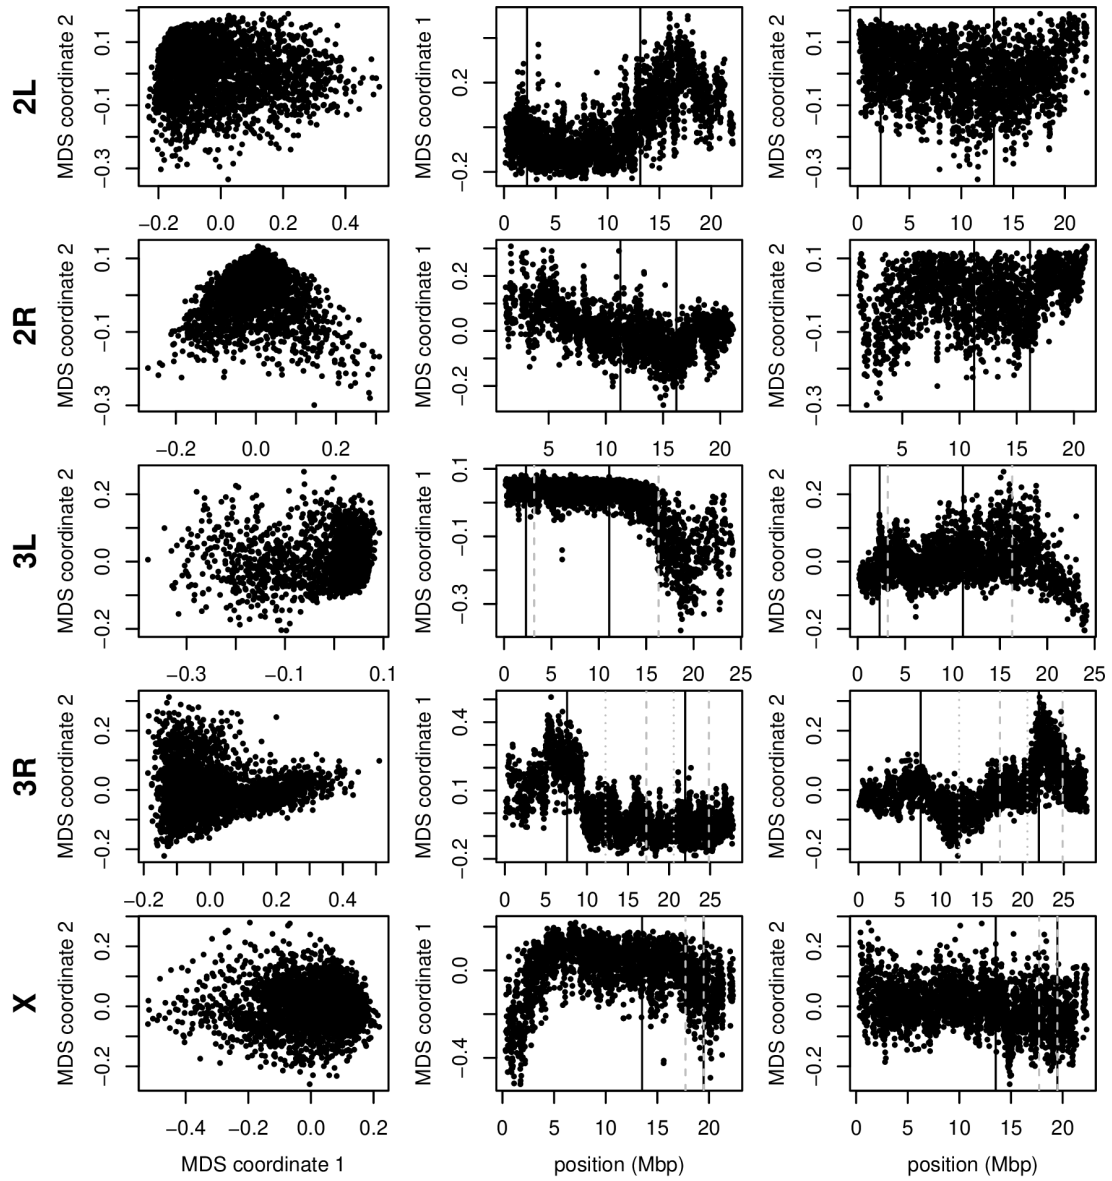

Figure S10: Variation in structure for windows of 1,000 SNPs across *Drosophila melanogaster* chromosome arms: without inversions. As in Figure 2, but after omitting for each chromosome arm individuals carrying the less frequent orientation of any inversions on that chromosome arm. The values differ from those in 4 in the window size used and that some MDS values were inverted (but relative orientation is meaningless as chromosome arms were run separately, unlike for *Medicago*). In all plots, each point represents one window along the genome. The first column shows the MDS visualization of relationships between windows, and the second and third columns show the midpoint of each window against the two MDS coordinates; rows correspond to chromosome arms. Vertical lines show the breakpoints of known polymorphic inversions.
