# Supplementary material
Source: publisher figshare collection journal article supplement (https://gsajournals.figshare.com/articles/dataset/_/7324526)
Supplement: Supplementary file 1 [file 1 › Fig_S11.pdf]

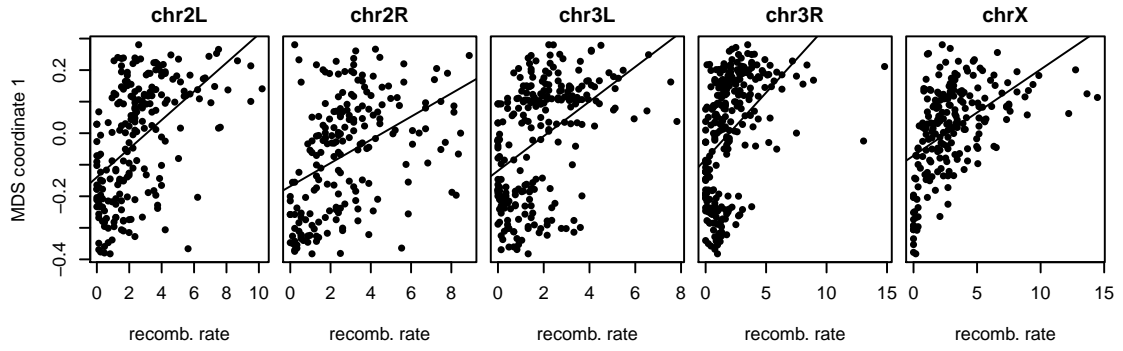

Figure S11: Recombination rate, and the effects of population structure for *Drosophila melanogaster*: this shows the first MDS coordinate and recombination rate (in cM/Mbp), as in Figure 4, against each other. Since the windows underlying estimates of Figure 4 do not coincide, to obtain correlations we divided the genome into 100Kbp bins, and for each variable (recombination rate and MDS coordinate 1) averaged the values of each overlapping bin with weight proportional to the proportion of overlap. The correlation coefficient and  $p$ -values for each linear regression are as follows: 2L: correlation = 0.52,  $r^2 = 0.27$ ; 2R: correlation = 0.43,  $r^2 = 0.18$ ; 3L: correlation = 0.47,  $r^2 = 0.21$ ; 3R: correlation = 0.46,  $r^2 = 0.21$ ; X: correlation = 0.50,  $r^2 = 0.24$ .
