# Supplementary material
Source: publisher figshare collection journal article supplement (https://gsajournals.figshare.com/articles/dataset/_/7324526)
Supplement: Supplementary file 1 [file 1 › Fig_S15.pdf]

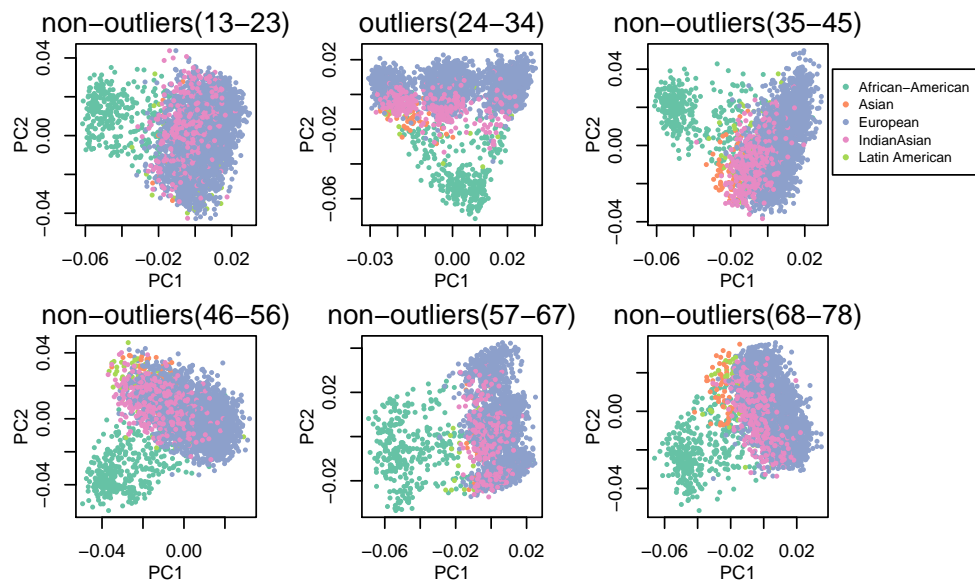

Figure S15: Comparison of PCA figures within outlying windows (center column) and flanking non-outlying windows (left and right columns) for the two windows having outlying MDS scores on chromosome 8.
