# Supplementary material
Source: publisher figshare collection journal article supplement (https://gsajournals.figshare.com/articles/dataset/_/7324526)
Supplement: Supplementary file 1 [file 1 › Fig_S16.pdf]

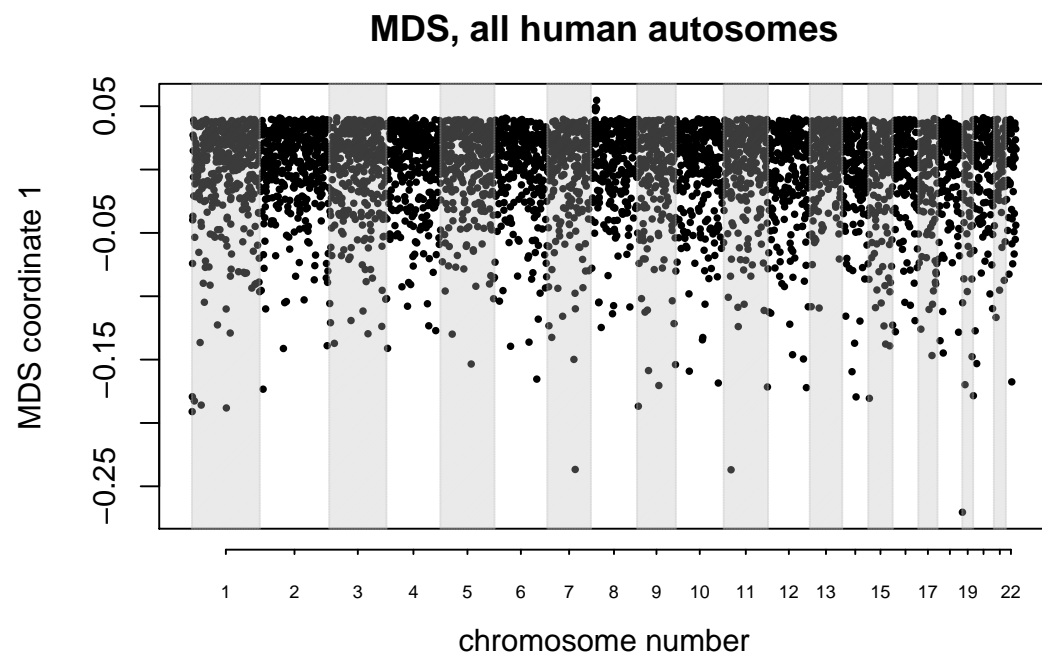

Figure S16: MDS visualization of variation in the effects of population structure amongst windows across *all* human autosomes simultaneously. The small group of windows with positive outlying MDS values lie around the inversion at 8p23.
