# Supplementary material
Source: publisher figshare collection journal article supplement (https://gsajournals.figshare.com/articles/dataset/_/7324526)
Supplement: Supplementary file 1 [file 1 › Fig_S17.pdf]

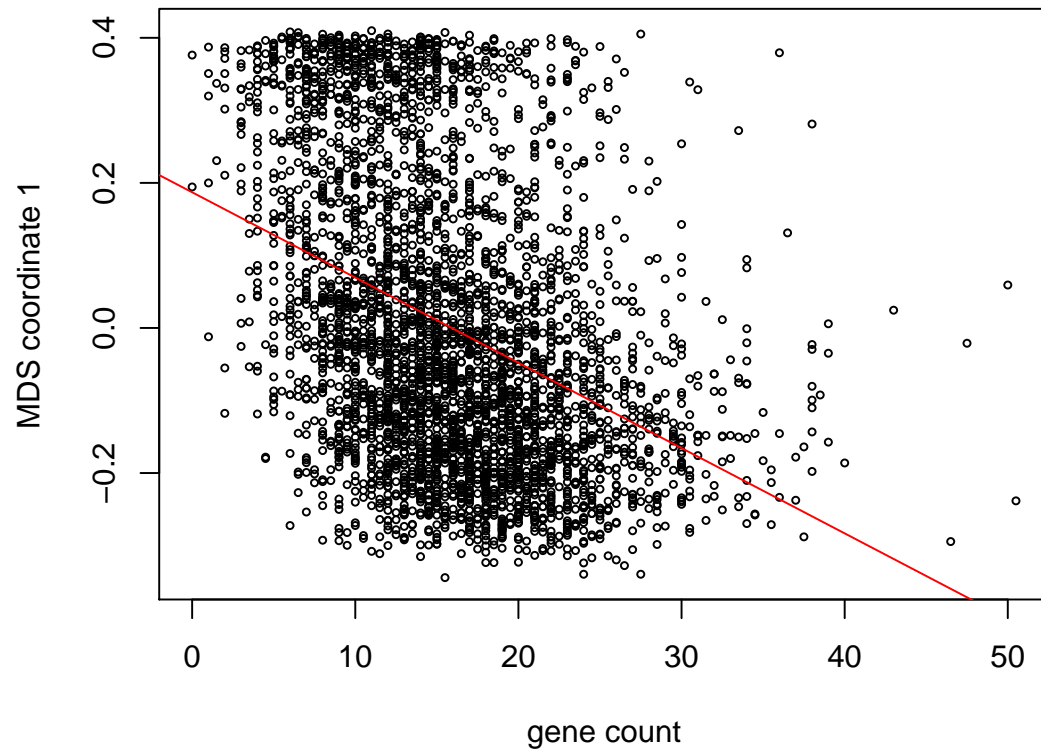

Figure S17: First MDS coordinate against gene density for all 8 chromosomes of *M. truncatula*. The first MDS coordinate is significantly correlated with gene count ( $r = 0.149$ ,  $p = 2.2 \times 10^{-16}$ ).
