# Supplementary material
Source: publisher figshare collection journal article supplement (https://gsajournals.figshare.com/articles/dataset/_/7324526)
Supplement: Supplementary file 1 [file 1 › Fig_S18.pdf]

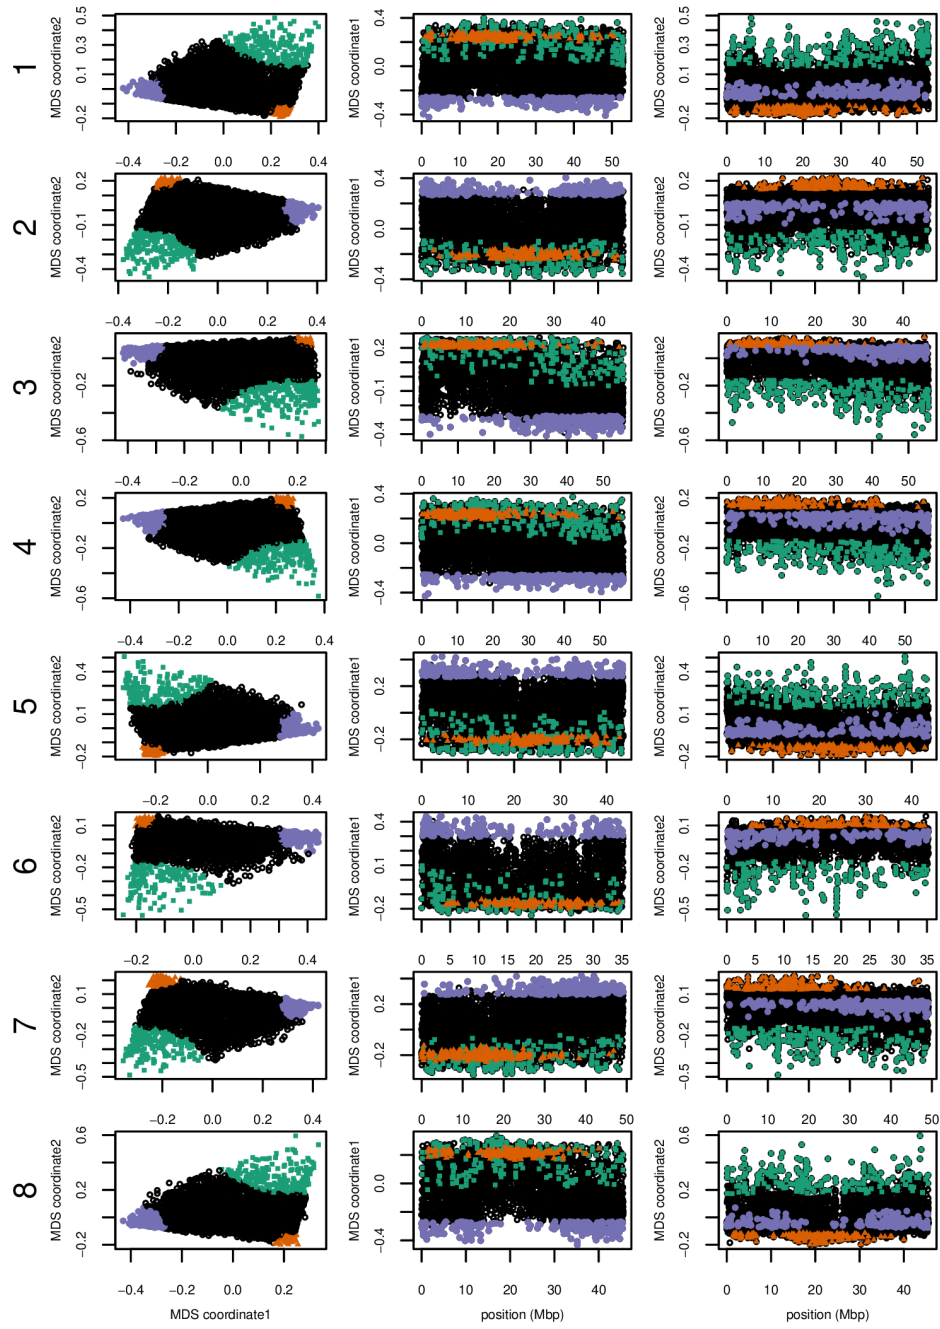

Figure S18: MDS visualizations of the effects of population structure for all 8 chromosomes of the *Medicago truncatula* data, using windows of  $10^4$  SNPs.
