# Supplementary material
Source: publisher figshare collection journal article supplement (https://gsajournals.figshare.com/articles/dataset/_/7324526)
Supplement: Supplementary file 1 [file 1 › Fig_S19.pdf]

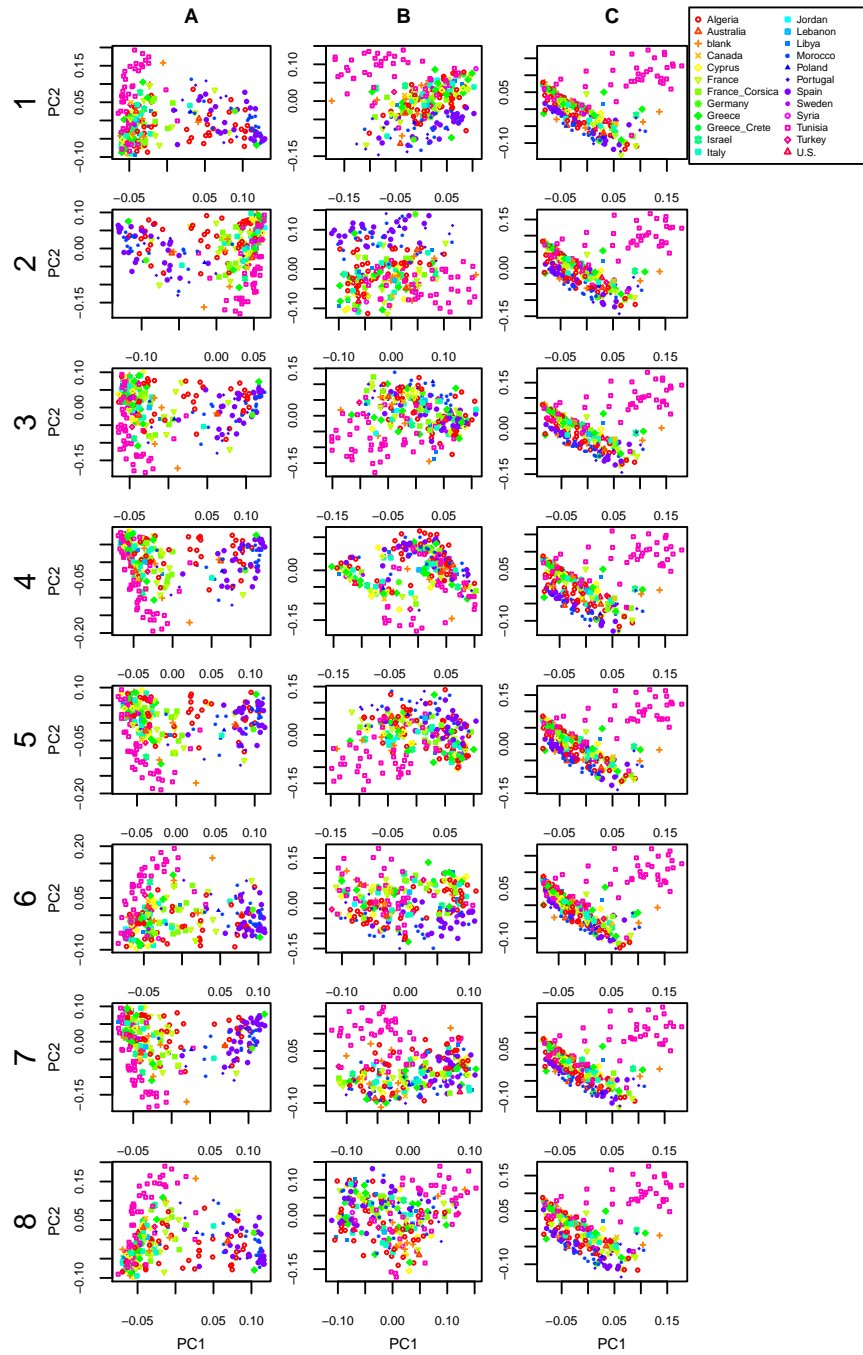

Figure S19: PCA plots for regions colored in Figure S18 on all 8 chromosomes of *Medicago truncatula*: (A) green, (B) orange, and (C) purple.
