# Supplementary material
Source: publisher figshare collection journal article supplement (https://gsajournals.figshare.com/articles/dataset/_/7324526)
Supplement: Supplementary file 1 [file 1 › Table_S1.pdf]

|                   | 10000 SNPs | 1000 SNPs | 10000 SNPs | 100000bp | 10000bp |
|-------------------|------------|-----------|------------|----------|---------|
| MDS1              | 2 PCs      | 2 PCs     | 5 PCs      | 2 PCs    | 2 PCs   |
| 10000 SNPs, 2 PCs | 1.00       | 0.87      | 0.96       | 0.90     | 0.88    |
| 1000 SNPs, 2 PCs  | 0.68       | 1.00      | 0.73       | 0.68     | 0.94    |
| 10000 SNPs, 5 PCs | 0.96       | 0.92      | 1.00       | 0.88     | 0.93    |
| 100000bp, 2 PCs   | 0.90       | 0.87      | 0.88       | 1.00     | 0.87    |
| 10000bp, 2 PCs    | 0.68       | 0.93      | 0.72       | 0.67     | 1.00    |
| MDS2              |            |           |            |          |         |
| 10000 SNPs, 2 PCs | 1.00       | 0.54      | 0.93       | 0.87     | 0.56    |
| 1000 SNPs, 2 PCs  | 0.82       | 1.00      | 0.76       | 0.83     | 0.92    |
| 10000 SNPs, 5 PCs | 0.93       | 0.50      | 1.00       | 0.83     | 0.52    |
| 100000bp, 2 PCs   | 0.87       | 0.59      | 0.84       | 1.00     | 0.58    |
| 10000bp, 2 PCs    | 0.83       | 0.92      | 0.77       | 0.84     | 1.00    |

Table S2: Correlations between MDS coordinates of genomic regions between runs with different parameter values. To produce these, we first ran the algorithm with the specified window size and number of PCs ( $k$  in equation (1)) on the full *Medicago truncatula* dataset. Then to obtain the correlation between results obtained from parameters A in the row of the matrix above and parameters B in the column of the matrix above, we mapped the windows of B to those of A by averaging MDS coordinates of any windows of B whose midpoints lay in the corresponding window of A; we then computed the correlation between the MDS coordinates of A and the averaged MDS coordinates of B. This is not a symmetric operation, so these matrices are not symmetric. As expected, parameter values with smaller windows produce noisier estimates, but plots of MDS values along the genome are visually very similar.
