# Supplementary material
Source: publisher figshare collection journal article supplement (https://gsajournals.figshare.com/articles/dataset/_/7324526)

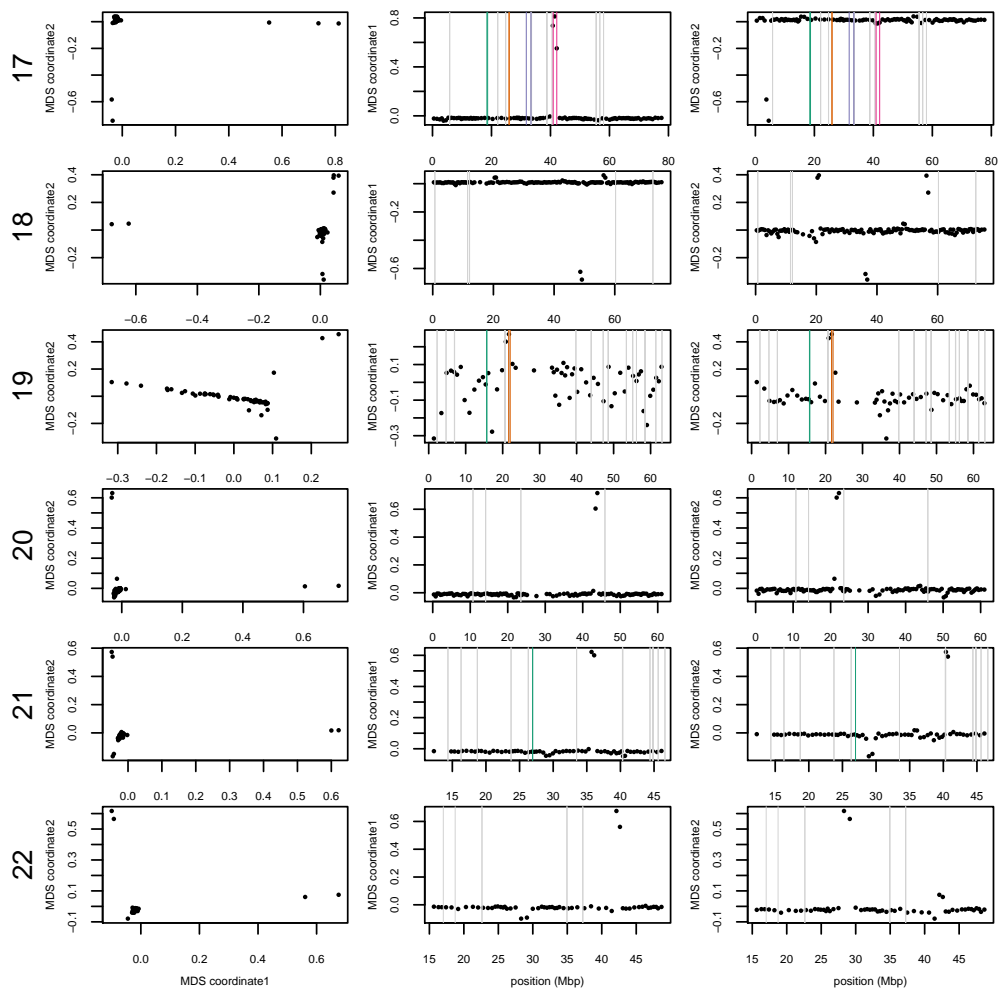

Figure S14: MDS plots for human chromosomes 17-22, as in Supplementary Figure S12.

Supplement: Supplementary file 1 [file 1 › Fig_S14.pdf]

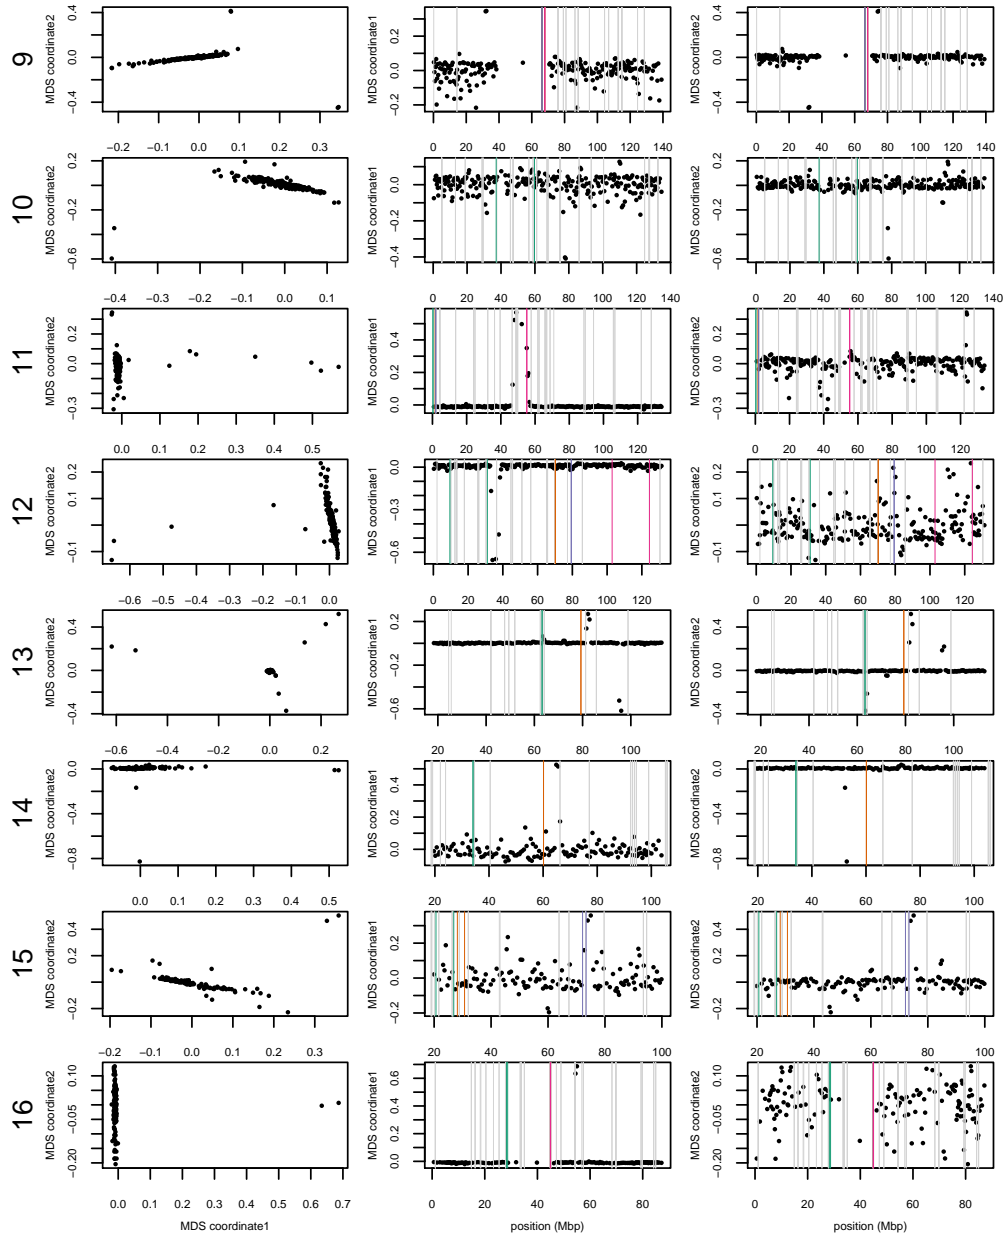

Figure S13: MDS plots for human chromosomes 9-16, as in Supplementary Figure S12.

Supplement: Supplementary file 1 [file 1 › Fig_S13.pdf]

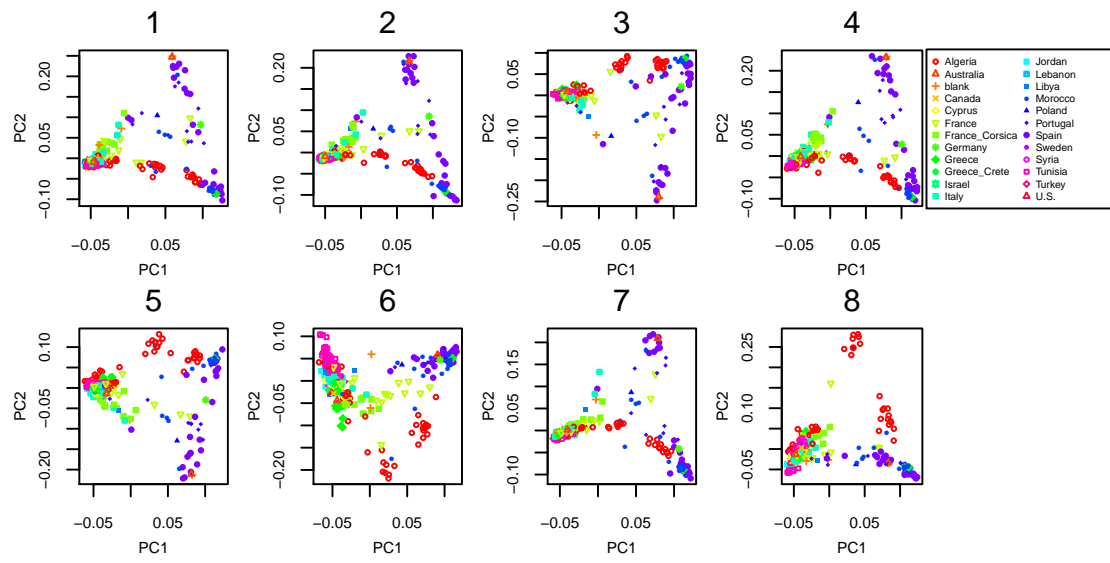

Figure S3: PCA plots for all 8 chromosomes in the *Medicago truncatula* dataset.

Supplement: Supplementary file 1 [file 1 › Fig_S3.pdf]

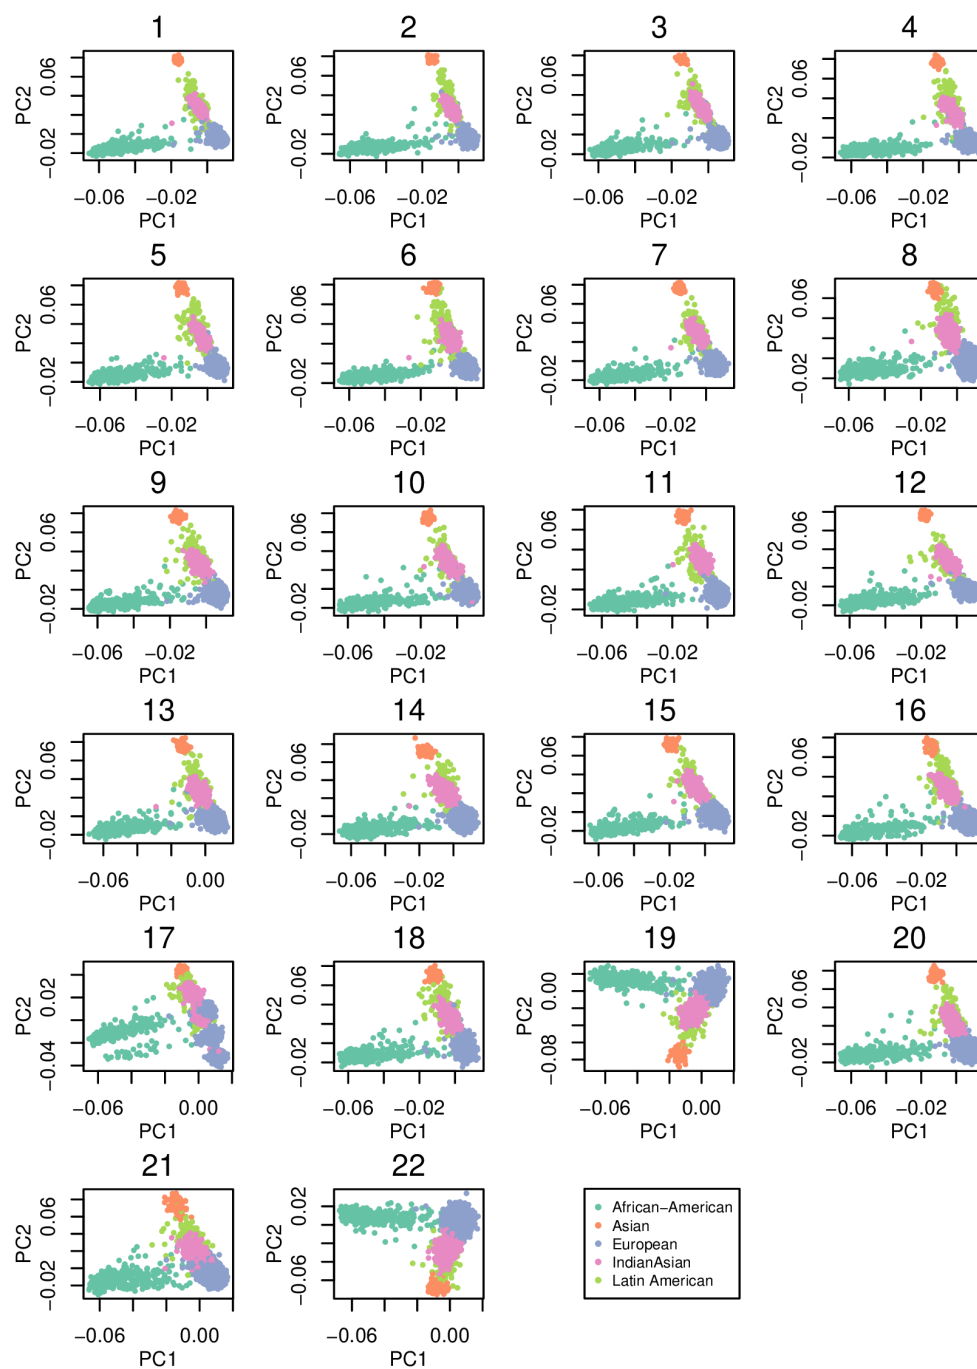

Figure S2: PCA plots for all 22 human autosomes from the POPRES data.

Supplement: Supplementary file 1 [file 1 › Fig_S2.pdf]

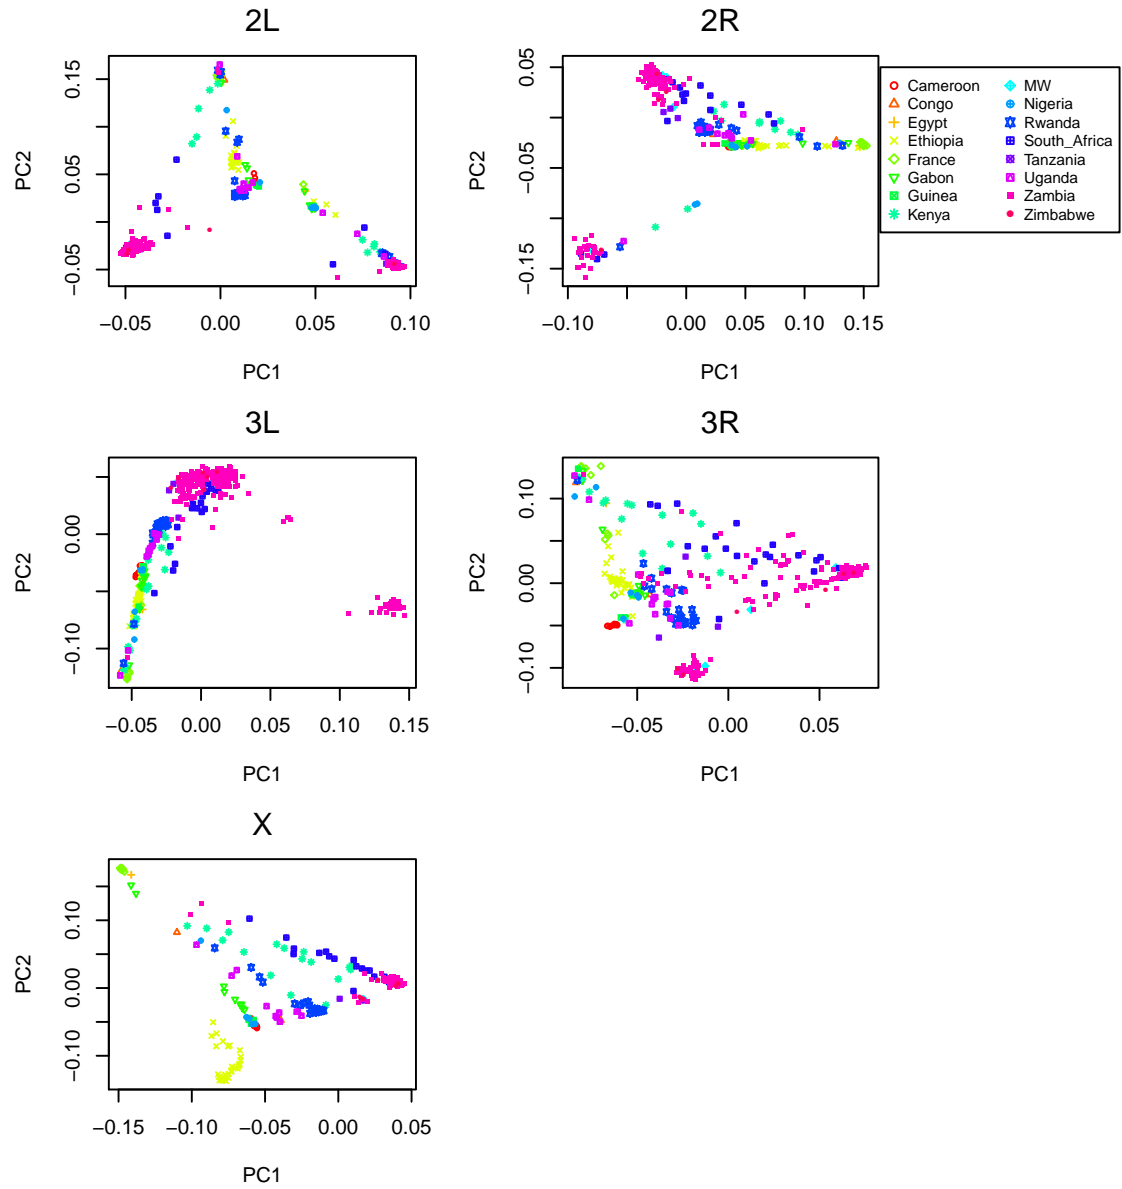

Figure S1: PCA plots for chromosome arms 2L, 2R, 3L, 3R and X of the *Drosophila melanogaster* dataset.

Supplement: Supplementary file 1 [file 1 › Fig_S1.pdf]
